# Supplementary material
Source: PubMed Central journal article supplement (PMC3137080)
Supplement: supp_M110.214486_jbc.M110.214486-1.pdf [file supp_M110.214486_jbc.M110.214486-1.pdf]

## Supplementary information online

### ***Structure-function analysis of core STRIPAK: a signalling complex implicated in Golgi polarization***

*Michelle J Kean, Derek Ceccarelli, Marilyn Goudreault, Mario Sanches, Stephen Tate, Brett Larsen, Lucien C.D. Gibson, W. Brent Derry, Ian C. Scott, Laurence Pelletier, George S. Baillie, Frank Sicheri, Anne-Claude Gingras*

#### List of Supplementary Online Figures and Tables

##### **Supplementary Figure 1**

Striatin alignment and expression levels of FLAG-STRN3 truncation mutants page 2

##### **Supplementary Figure 2**

Association of full length Strn and STRN3 truncation mutants with CCM3 page 3

##### **Supplementary Figure 3**

Coomassie stain of STRN3 220-338 peptide library spotted on Whatman membrane page 3

##### **Supplementary Figure 4**

Chromatogram and gel of PP2AA and STRN3 57-169 page 3

##### **Supplementary Figure 5**

FLAG-Mst4 localizes to the Golgi page 4

##### **Supplementary Figure 6**

Knock-down efficiency page 4

##### **Supplementary Figure 7**

Knockdown of CCM3 and STRNs using siRNAs induce an opposite effect on the localization of MST4 page 5

##### **Supplementary Table I**

Mass spectrometry results used to generate Figure 1C page 6

##### **Supplementary Table II**

Data corresponding to the fluorescence polarization assay in Figure 2E page 12

##### **Supplementary Table III**

SAINT-filtered interactions for GM130 page 13

##### **Supplementary Table IV**

Detailed mass spectrometry data for the GM130 interactions page 14

##### **Supplementary Table V**

Mass spectrometry data used to quantify the recovery of STRIPAK components and GM130 in FLAG-MST4 immunoprecipitates following silencing of CCM3 or STRNs by esiRNA page 16

#### **Supplementary References**

Choi, H., Larsen, B., Lin, Z. Y., Breikreutz, A., Mellacheruvu, D., Fermin, D., Qin, Z. S., Tyers, M., Gingras, A. C., and Nesvizhskii, A. I. (2011) *Nat Methods* **8**, 70-73

Goudreault, M., D'Ambrosio, L. M., Kean, M. J., Mullin, M. J., Larsen, B. G., Sanchez, A., Chaudhry, S., Chen, G. I., Sicheri, F., Nesvizhskii, A. I., Aebersold, R., Raught, B., and Gingras, A. C. (2009) *Mol Cell Proteomics* **8**, 157-171

Preisinger, C., Short, B., De Corte, V., Bruyneel, E., Haas, A., Kopajtich, R., Gettemans, J., and Barr, F. A. (2004) *J Cell Biol* **164**, 1009-1020

A

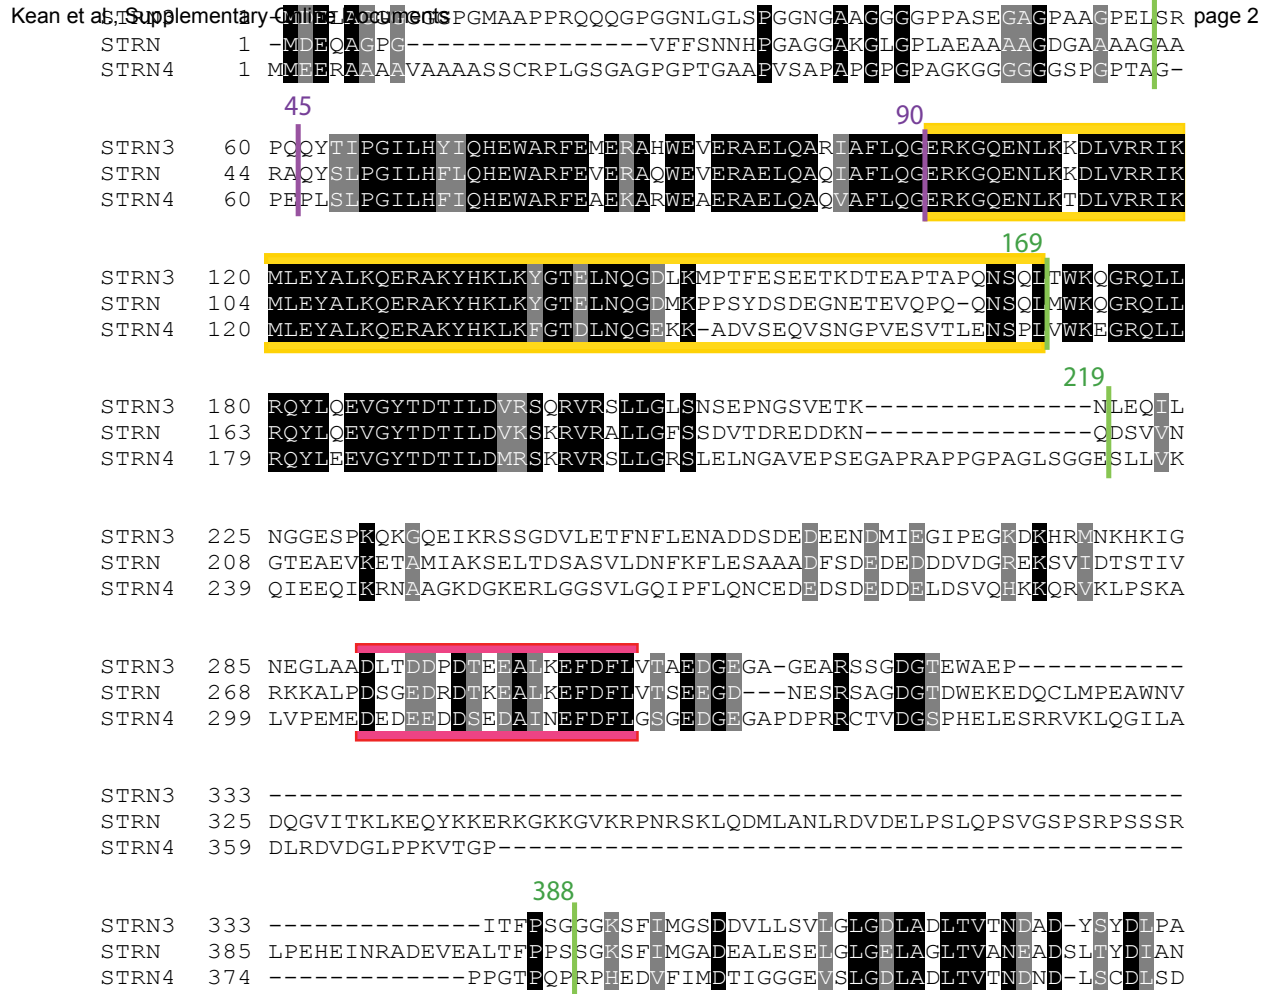

B

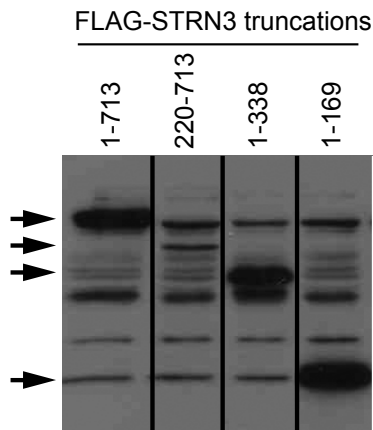

**Supplementary Figure 1. Striatin alignment and expression levels of FLAG-STRN3 truncation mutants.**  
 A) Sequence alignment of the N-terminus of mouse Strn, human STRN3 and human STRN4. Identical amino acids are highlighted in black; amino acid similarity is indicated in grey. The boundaries of the truncation mutants are indicated by vertical bars for mouse Strn (purple) and human STRN3 (green). The sequence boxed in yellow corresponds to the region mapped as directly binding to the PP2AA subunit; this region also contains a coiled-coil dimerization domain. The region boxed in pink corresponds to the minimal binding peptide for CCM3 binding. B) Expression levels of FLAG-STRN3 1-713, 220-713, 1-338 and 1-169 in the stable human cell lines used for AP-MS.

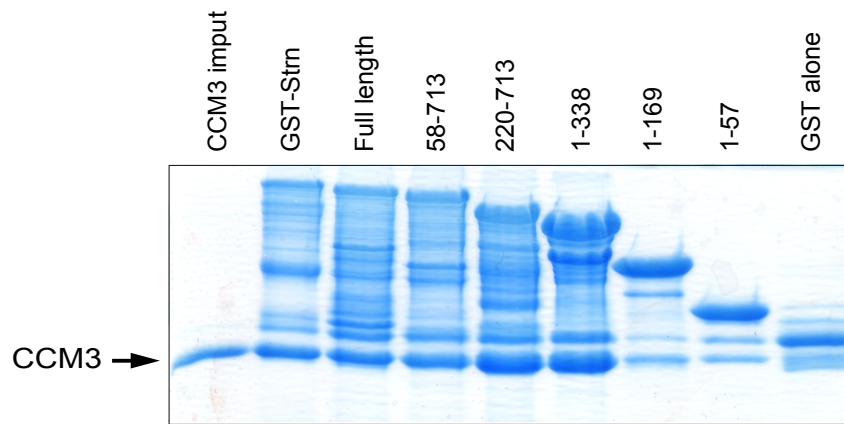

### Supplementary Figure 2. Association of full length Strn and STRN3 truncation mutants with CCM3.

Bacterially expressed recombinant soluble CCM3 was tested for its ability to be pulled-down by GST alone, GST-Strn full length or GST-STRN3 full length or indicated deletion mutants. Bound proteins were analysed by SDS-PAGE followed by Coomassie staining. The position of CCM3 is indicated.

STRN3 220-338 peptide array

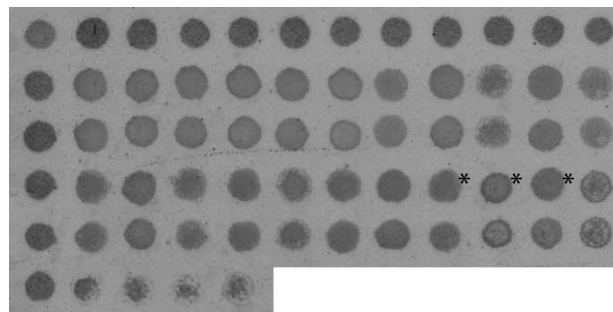

### Supplementary Figure 3. Coomassie stain of STRN3 220-338 peptide library spotted on Whatman membrane.

A peptide library of STRN3 220-338 (15 mers) was produced by automatic SPOT synthesis on a cellulose membrane. Coomassie staining was performed to evaluate peptide amounts prior to use in the overlay assays. The interaction of spotted peptides with GST alone and GST-CCM3 is shown in Figure 2E; spots indicated by an asterisk were shown to interact with GST-CCM3 but not with GST alone.

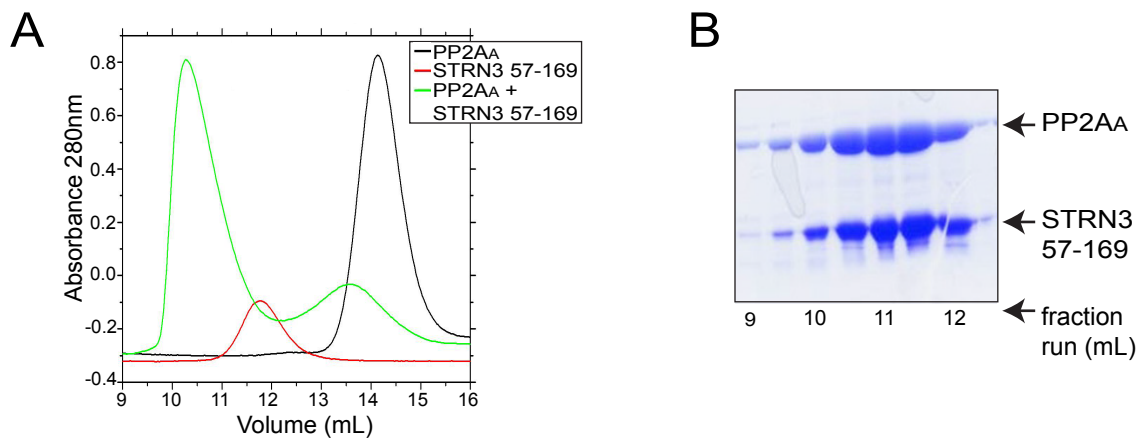

### Supplementary Figure 4. Chromatogram and gel of PP2Aa and STRN3 57-169.

A) Elution profile of PP2Aa (black), STRN3 57-169 (red) and PP2Aa combined with STRN3 57-169 (green) from a 24 mL Superdex S200 gel filtration column. STRN3 57-169 encompasses the coiled coil domain of STRN3 and multimerizes. B) Fractions between 9 mL and 12.5 mL from the PP2Aa + STRN3 57-169 (green) run were resolved on a SDS gel and Coomassie stained.

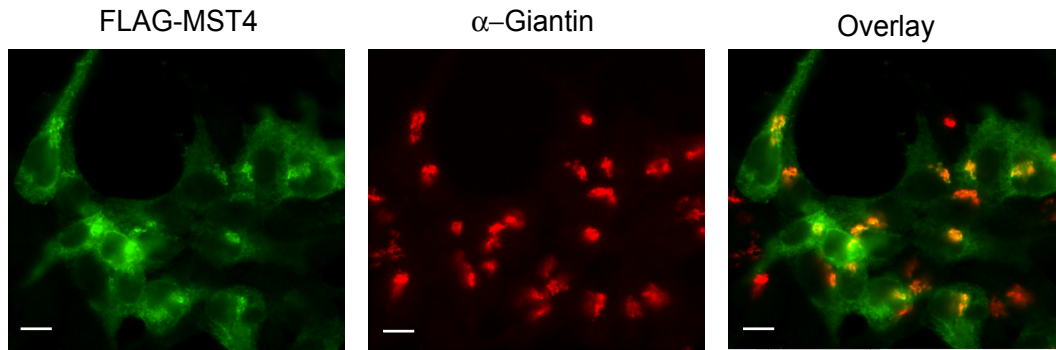

### Supplementary Figure 5. FLAG-MST4 localizes to the Golgi.

In stable HEK293 cell pools, the FLAG-tagged kinase MST4 (green) partially co-localizes with the Golgi marker giantin (a fraction of MST4 also localizes to the cytosol as punctae). Scale bar = 10  $\mu$ m.

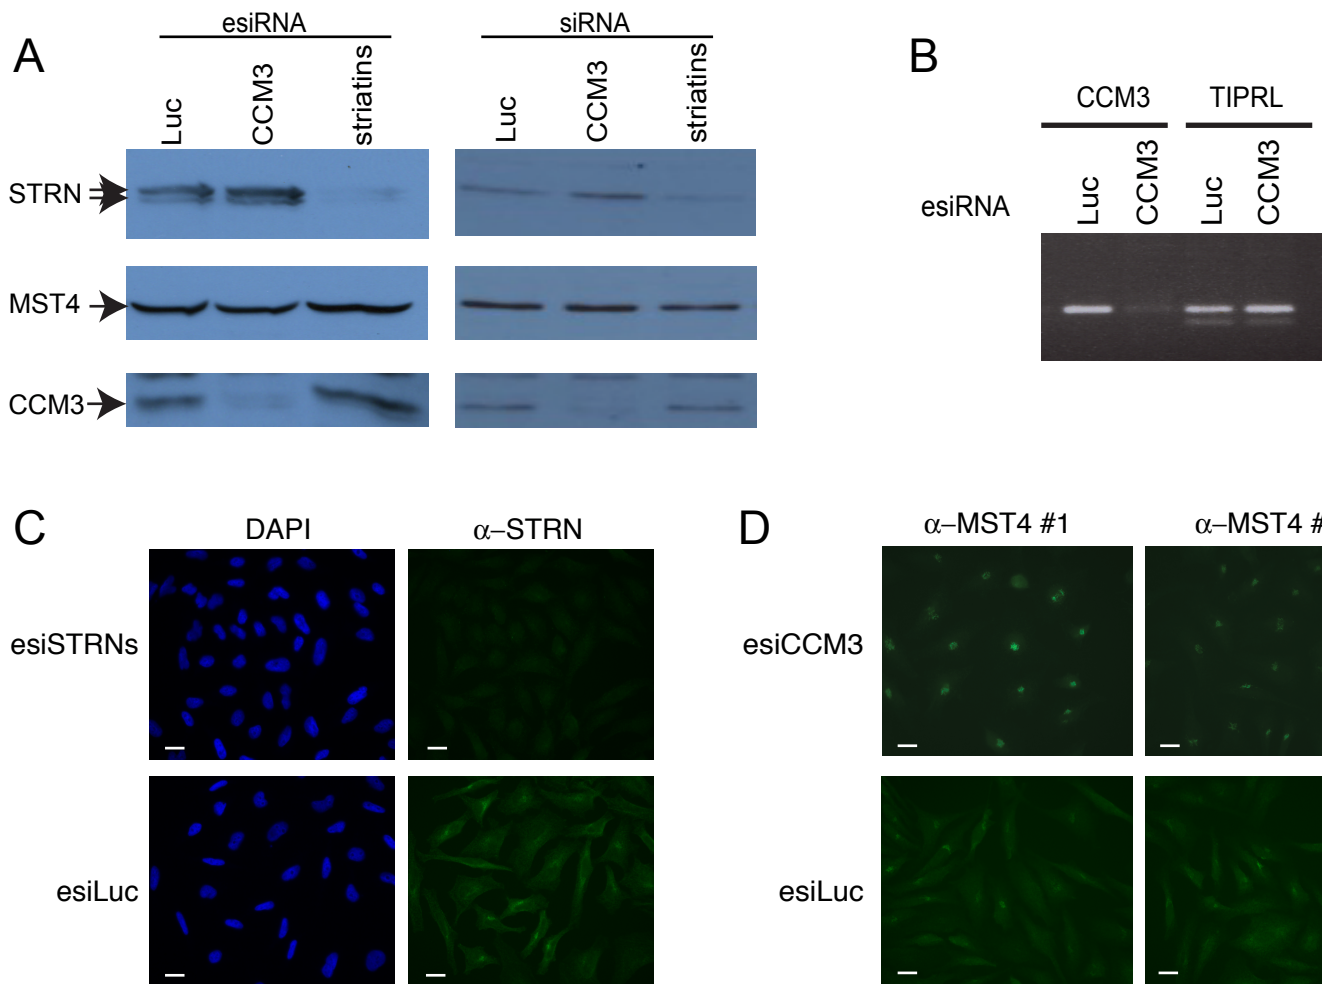

### Supplementary Figure 6. Knock-down efficiency.

A) Efficiency of esiRNA-mediated knockdown of striatins and CCM3 in HeLa cells and siRNA mediated knockdown in 293 cells, as shown by immunoblot against both proteins (note that knockdown of CCM3 does not affect expression of STRN and vice versa). MST4 is used as a loading control. B) Efficiency of CCM3 knockdown by esiRNA in HeLa cells, as detected by RT-PCR. Primers amplifying the unrelated gene TIPRL were used as loading controls. C) Knockdown of STRNs by esiRNA in HeLa cells is uniform and efficient, as determined by immunofluorescence staining with  $\alpha$ -STRN (nuclei are stained with DAPI). D) Indirect assay for the knockdown efficiency of CCM3 via immunofluorescence detection of the localization of MST4 (our endogenous antibodies to CCM3 are not appropriate for immunofluorescence). Two separate fields (labeled #1 and #2) are shown to illustrate efficiency of knockdown. Note that MST4 is uniformly relocalized to the Golgi in all cells observed, indicating a uniform knockdown efficiency of CCM3. Scale bar = 10  $\mu$ m

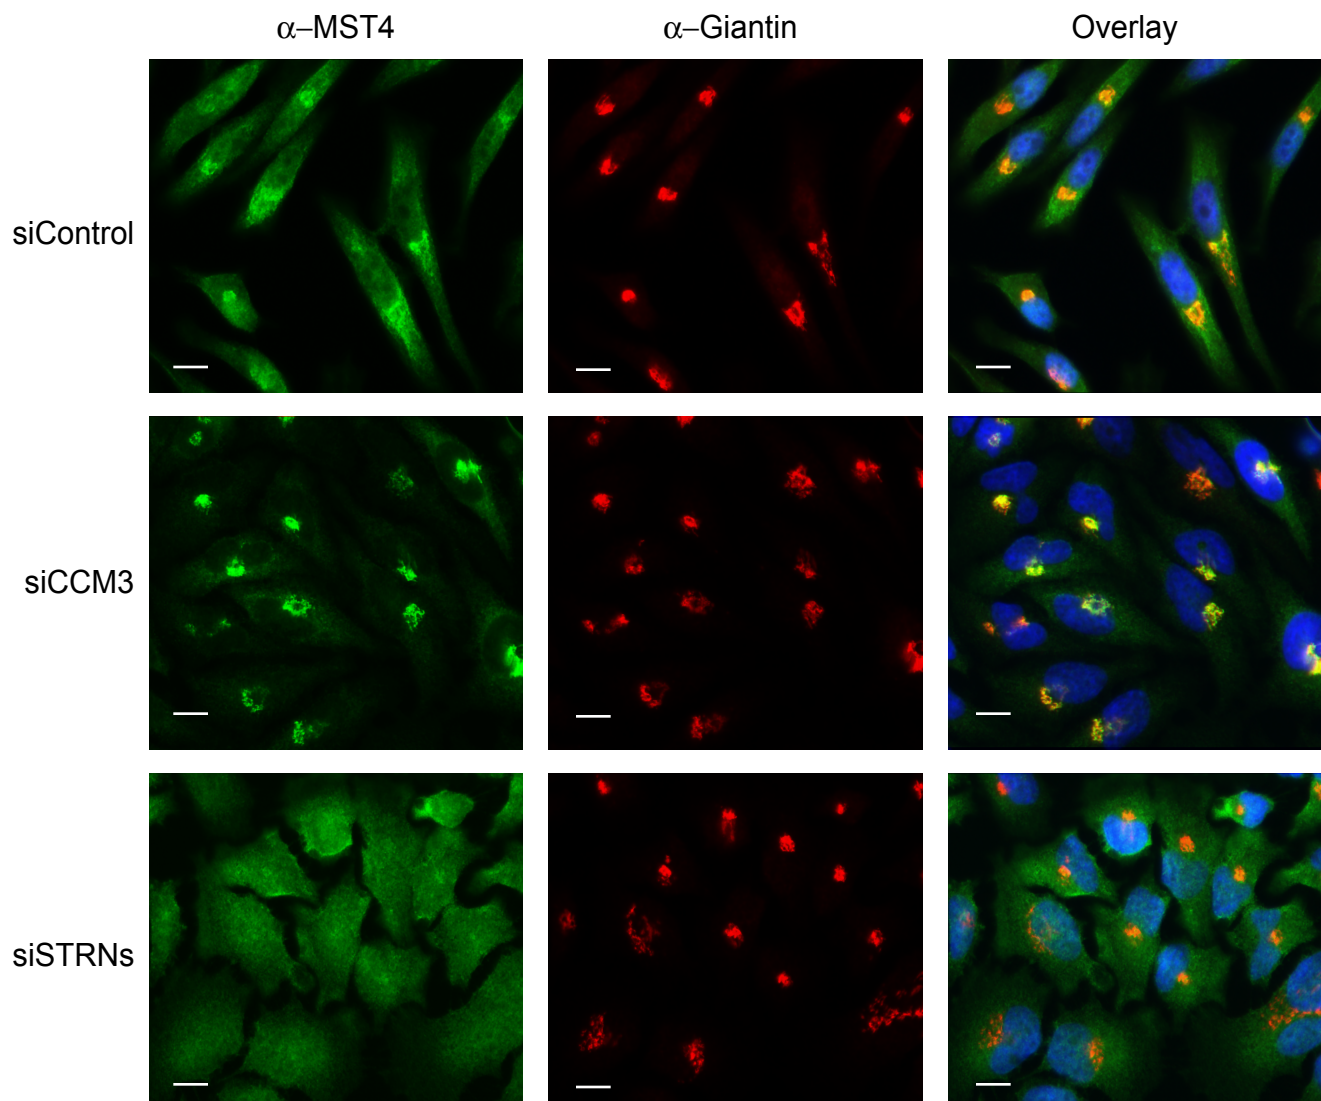

**Supplementary Figure 7. Knockdown of CCM3 and STRNs using siRNAs induce an opposite effect on the localization of MST4.**

siRNA mediated depletion of CCM3 induces near complete localization of MST4 to the Golgi while depletion of striatins using siRNAs prevents Golgi localization. These data are consistent with the esiRNA data presented in Figure 5. Scale bars = 10 $\mu$ m.

**Supplementary Table I.** Mass spectrometry data used to create Figure 1C. AP-MS analysis of Strn or STRN3 (full length or indicated deletion mutants) was performed in biological duplicates. Data corresponding to STRIPAK components and to the CCT chaperonin complex (as defined in Goudreault et al., *Mol Cell Proteomics*, 2009) was extracted. "ProHits ID" is the unique identifier for the sample in our internal interaction database, "Mascot" is the score from the Mascot search engine, "n specs" is the total number of peptides, or spectral counts, "n peps" is the number of unique peptides (as defined by the Mascot search engine) and "% cover" is the proportion of the protein sequence that has been detected by mass spectrometry.

| ProHits ID | Bait Name | Hit Name  | Hit Gene ID | gi number | Mascot | n specs | n peps | % cover |
|------------|-----------|-----------|-------------|-----------|--------|---------|--------|---------|
| 5341       | STRN3 -1  | CCT2      | 10576       | 5453603   | 632    | 23      | 10     | 29      |
| 5344       | STRN3 -2  | CCT2      | 10576       | 5453603   | 720    | 21      | 12     | 33.1    |
| 5341       | STRN3 -1  | CCT3      | 7203        | 58761486  | 545    | 14      | 9      | 19.1    |
| 5344       | STRN3 -2  | CCT3      | 7203        | 58761486  | 389    | 12      | 6      | 17.5    |
| 5341       | STRN3 -1  | CCT4      | 10575       | 38455427  | 200    | 6       | 4      | 10.2    |
| 5344       | STRN3 -2  | CCT4      | 10575       | 38455427  | 627    | 24      | 12     | 30.6    |
| 5341       | STRN3 -1  | CCT5      | 22948       | 24307939  | 274    | 8       | 6      | 10.5    |
| 5344       | STRN3 -2  | CCT5      | 22948       | 24307939  | 570    | 19      | 8      | 26.6    |
| 5341       | STRN3 -1  | CCT6A     | 908         | 4502643   | 250    | 10      | 5      | 10.4    |
| 5344       | STRN3 -2  | CCT6A     | 908         | 4502643   | 665    | 20      | 14     | 39.9    |
| 5341       | STRN3 -1  | CCT7      | 10574       | 5453607   | 351    | 8       | 5      | 12.9    |
| 5344       | STRN3 -2  | CCT7      | 10574       | 5453607   | 514    | 15      | 9      | 21.9    |
| 5341       | STRN3 -1  | CCT8      | 10694       | 48762932  | 641    | 19      | 12     | 23.5    |
| 5344       | STRN3 -2  | CCT8      | 10694       | 48762932  | 651    | 25      | 12     | 23      |
| 5341       | STRN3 -1  | CTTNBP2   | 83992       | 16975496  | 383    | 10      | 6      | 4.3     |
| 5344       | STRN3 -2  | CTTNBP2   | 83992       | 16975496  | 554    | 16      | 10     | 7.9     |
| 5341       | STRN3 -1  | CTTNBP2NL | 55917       | 24308179  | 1022   | 38      | 16     | 28.2    |
| 5344       | STRN3 -2  | CTTNBP2NL | 55917       | 24308179  | 1357   | 72      | 21     | 41.8    |
| 5341       | STRN3 -1  | FAM40A    | 85369       | 56790935  | 1409   | 61      | 26     | 37      |
| 5344       | STRN3 -2  | FAM40A    | 85369       | 56790935  | 1803   | 159     | 30     | 49.8    |
| 5341       | STRN3 -1  | FAM40B    | 57464       | 55742705  | 461    | 16      | 6      | 11      |
| 5344       | STRN3 -2  | FAM40B    | 57464       | 197245444 | 586    | 20      | 7      | 16.1    |
| 5341       | STRN3 -1  | FGFR1OP2  | 26127       | 24308111  | 180    | 9       | 4      | 23.3    |
| 5344       | STRN3 -2  | FGFR1OP2  | 26127       | 24308111  | 655    | 26      | 10     | 54.2    |
| 5341       | STRN3 -1  | MOBKL3    | 25843       | 41349449  | 372    | 20      | 6      | 40.9    |
| 5344       | STRN3 -2  | MOBKL3    | 25843       | 41349449  | 490    | 63      | 7      | 41.3    |
| 5341       | STRN3 -1  | PDCD10    | 11235       | 20127517  | 401    | 16      | 7      | 48.1    |
| 5344       | STRN3 -2  | PDCD10    | 11235       | 20127517  | 694    | 42      | 11     | 66      |
| 5344       | STRN3 -2  | PPP2CA    | 5515        | 4506017   | 469    | 65      | 7      | 31.1    |
| 5341       | STRN3 -1  | PPP2CB    | 5516        | 4758952   | 439    | 20      | 9      | 31.7    |
| 5341       | STRN3 -1  | PPP2R1A   | 5518        | 21361399  | 798    | 32      | 15     | 29.5    |
| 5344       | STRN3 -2  | PPP2R1A   | 5518        | 21361399  | 1342   | 84      | 22     | 43.6    |
| 5341       | STRN3 -1  | PPP2R1B   | 5519        | 32455244  | 228    | 6       | 1      | 7       |
| 5344       | STRN3 -2  | PPP2R1B   | 5519        | 32455244  | 407    | 23      | 4      | 14.5    |
| 5341       | STRN3 -1  | MST4      | 51765       | 15011880  | 512    | 18      | 10     | 30.8    |
| 5344       | STRN3 -2  | MST4      | 51765       | 15011880  | 973    | 39      | 15     | 36.5    |
| 5341       | STRN3 -1  | SIKE1     | 80143       | 156151377 | 460    | 13      | 7      | 45.4    |
| 5344       | STRN3 -2  | SIKE1     | 80143       | 156151377 | 782    | 24      | 12     | 62.3    |
| 5341       | STRN3 -1  | SLMAP     | 7871        | 56550043  | 1477   | 55      | 26     | 35.8    |
| 5344       | STRN3 -2  | SLMAP     | 7871        | 56550043  | 1807   | 82      | 32     | 43.4    |
| 5341       | STRN3 -1  | STK24     | 8428        | 20070158  | 441    | 16      | 3      | 23      |
| 5344       | STRN3 -2  | STK24     | 8428        | 20070158  | 935    | 41      | 6      | 33.2    |

|      |          |           |       |           |      |      |    |      |
|------|----------|-----------|-------|-----------|------|------|----|------|
| 5344 | STRN3 -2 | STK25     | 10494 | 21361358  | 494  | 17   | 1  | 18.3 |
| 5341 | STRN3 -1 | STRN      | 6801  | 51242945  | 1066 | 27   | 16 | 30.3 |
| 5344 | STRN3 -2 | STRN      | 6801  | 51242945  | 1998 | 89   | 29 | 63.7 |
| 5341 | STRN3 -1 | STRN3     | 29966 | 142976686 | 1685 | 118  | 24 | 42.2 |
| 5344 | STRN3 -2 | STRN3     | 29966 | 142976686 | 2318 | 314  | 31 | 48.1 |
| 5341 | STRN3 -1 | STRN4     | 29888 | 89886477  | 893  | 31   | 12 | 25.5 |
| 5344 | STRN3 -2 | STRN4     | 29888 | 89886477  | 1674 | 125  | 19 | 52.2 |
| 5341 | STRN3 -1 | TCP1      | 6950  | 57863257  | 479  | 16   | 9  | 19.1 |
| 5344 | STRN3 -2 | TCP1      | 6950  | 57863257  | 475  | 11   | 7  | 20.5 |
| 4701 | Strn -1  | CCT2      | 10576 | 5453603   | 570  | 14   | 8  | 26   |
| 8738 | Strn -2  | CCT2      | 10576 | 5453603   | 1261 | 51   | 18 | 53.8 |
| 4701 | Strn -1  | CCT3      | 7203  | 58761486  | 315  | 7    | 5  | 14.5 |
| 8738 | Strn -2  | CCT3      | 7203  | 58761486  | 972  | 47   | 16 | 41.4 |
| 4701 | Strn -1  | CCT4      | 10575 | 38455427  | 340  | 7    | 6  | 20   |
| 8738 | Strn -2  | CCT4      | 10575 | 38455427  | 905  | 51   | 17 | 39   |
| 4701 | Strn -1  | CCT5      | 22948 | 24307939  | 481  | 12   | 7  | 21.3 |
| 8738 | Strn -2  | CCT5      | 22948 | 24307939  | 1200 | 61   | 22 | 50.5 |
| 4701 | Strn -1  | CCT6A     | 908   | 4502643   | 314  | 8    | 4  | 13.4 |
| 8738 | Strn -2  | CCT6A     | 908   | 4502643   | 894  | 36   | 17 | 38.4 |
| 4701 | Strn -1  | CCT7      | 10574 | 5453607   | 381  | 9    | 4  | 11.8 |
| 8738 | Strn -2  | CCT7      | 10574 | 5453607   | 814  | 32   | 14 | 30.9 |
| 4701 | Strn -1  | CCT8      | 10694 | 48762932  | 388  | 7    | 6  | 13.9 |
| 8738 | Strn -2  | CCT8      | 10694 | 48762932  | 1384 | 61   | 26 | 45.6 |
| 4701 | Strn -1  | CTTNBP2   | 83992 | 16975496  | 46   | 4    | 1  | 0.8  |
| 8738 | Strn -2  | CTTNBP2   | 83992 | 16975496  | 260  | 9    | 5  | 3.8  |
| 4701 | Strn -1  | CTTNBP2NL | 55917 | 24308179  | 716  | 18   | 12 | 29.7 |
| 8738 | Strn -2  | CTTNBP2NL | 55917 | 24308179  | 1570 | 76   | 27 | 49   |
| 4701 | Strn -1  | FAM40A    | 85369 | 56790935  | 1446 | 67   | 21 | 37.4 |
| 8738 | Strn -2  | FAM40A    | 85369 | 56790935  | 1766 | 176  | 29 | 43.1 |
| 4701 | Strn -1  | FAM40B    | 57464 | 197245444 | 242  | 6    | 3  | 9.6  |
| 8738 | Strn -2  | FAM40B    | 57464 | 55742705  | 658  | 24   | 10 | 20.1 |
| 4701 | Strn -1  | FGFR1OP2  | 26127 | 24308111  | 556  | 20   | 7  | 37.5 |
| 8738 | Strn -2  | FGFR1OP2  | 26127 | 24308111  | 864  | 37   | 13 | 64.4 |
| 4701 | Strn -1  | MOBKL3    | 25843 | 41349449  | 414  | 40   | 5  | 38.2 |
| 8738 | Strn -2  | MOBKL3    | 25843 | 41349449  | 454  | 150  | 6  | 40.9 |
| 4701 | Strn -1  | PDCD10    | 11235 | 20127517  | 604  | 28   | 10 | 58.5 |
| 8738 | Strn -2  | PDCD10    | 11235 | 20127517  | 440  | 32   | 8  | 56.1 |
| 4701 | Strn -1  | PPP2CA    | 5515  | 4506017   | 433  | 22   | 7  | 33.3 |
| 8738 | Strn -2  | PPP2CA    | 5515  | 4506017   | 485  | 56   | 9  | 33.7 |
| 4701 | Strn -1  | PPP2R1A   | 5518  | 21361399  | 950  | 46   | 14 | 33.1 |
| 8738 | Strn -2  | PPP2R1A   | 5518  | 21361399  | 1459 | 116  | 24 | 48.2 |
| 8738 | Strn -2  | PPP2R1B   | 5519  | 32455246  | 441  | 26   | 2  | 15.5 |
| 4701 | Strn -1  | MST4      | 51765 | 15011880  | 630  | 24   | 9  | 23.3 |
| 8738 | Strn -2  | MST4      | 51765 | 15011880  | 538  | 31   | 4  | 30.3 |
| 4701 | Strn -1  | SIKE1     | 80143 | 156151377 | 497  | 9    | 6  | 36.2 |
| 8738 | Strn -2  | SIKE1     | 80143 | 156151377 | 658  | 26   | 11 | 66.2 |
| 4701 | Strn -1  | SLMAP     | 7871  | 56550043  | 1058 | 62   | 16 | 27.7 |
| 8738 | Strn -2  | SLMAP     | 7871  | 56550043  | 2024 | 138  | 40 | 48   |
| 4701 | Strn -1  | STK24     | 8428  | 20070158  | 570  | 26   | 4  | 22.6 |
| 8738 | Strn -2  | STK24     | 8428  | 20070158  | 681  | 33   | 12 | 28.7 |
| 4701 | Strn -1  | STRN      | 6801  | 51242945  | 2087 | 627  | 27 | 45.6 |
| 8738 | Strn -2  | STRN      | 6801  | 51242945  | 2942 | 1319 | 46 | 73.8 |
| 4701 | Strn -1  | STRN3     | 29966 | 142976686 | 893  | 23   | 13 | 28.4 |
| 8738 | Strn -2  | STRN3     | 29966 | 142976686 | 1803 | 156  | 24 | 43   |
| 4701 | Strn -1  | STRN4     | 29888 | 89886477  | 970  | 88   | 13 | 30.4 |

|                     |           |       |           |      |     |    |      |
|---------------------|-----------|-------|-----------|------|-----|----|------|
| 8738 Strn -2        | STRN4     | 29888 | 89886477  | 1721 | 225 | 21 | 50.1 |
| 4701 Strn -1        | TCP1      | 6950  | 57863257  | 497  | 9   | 7  | 25.9 |
| 8738 Strn -2        | TCP1      | 6950  | 57863257  | 1209 | 56  | 21 | 50.7 |
| 5350 Strn 45-780 -1 | CCT2      | 10576 | 5453603   | 1600 | 62  | 21 | 54.6 |
| 5694 Strn 45-780 -2 | CCT2      | 10576 | 5453603   | 345  | 9   | 5  | 18.5 |
| 5350 Strn 45-780 -1 | CCT3      | 7203  | 58761486  | 1202 | 49  | 19 | 43.4 |
| 5694 Strn 45-780 -2 | CCT3      | 7203  | 58761486  | 603  | 16  | 8  | 21.7 |
| 5350 Strn 45-780 -1 | CCT4      | 10575 | 38455427  | 1112 | 39  | 21 | 48.1 |
| 5694 Strn 45-780 -2 | CCT4      | 10575 | 38455427  | 432  | 16  | 7  | 21.2 |
| 5350 Strn 45-780 -1 | CCT5      | 22948 | 24307939  | 1629 | 60  | 27 | 57.3 |
| 5694 Strn 45-780 -2 | CCT5      | 22948 | 24307939  | 541  | 20  | 8  | 29.6 |
| 5350 Strn 45-780 -1 | CCT6A     | 908   | 4502643   | 879  | 40  | 15 | 37.7 |
| 5694 Strn 45-780 -2 | CCT6A     | 908   | 4502643   | 248  | 17  | 4  | 11.1 |
| 5350 Strn 45-780 -1 | CCT7      | 10574 | 5453607   | 755  | 26  | 13 | 30.4 |
| 5694 Strn 45-780 -2 | CCT7      | 10574 | 5453607   | 405  | 10  | 6  | 16.9 |
| 5350 Strn 45-780 -1 | CCT8      | 10694 | 48762932  | 1358 | 52  | 23 | 43.2 |
| 5694 Strn 45-780 -2 | CCT8      | 10694 | 48762932  | 789  | 25  | 14 | 30.5 |
| 5350 Strn 45-780 -1 | COPA      | 1314  | 148536853 | 35   | 1   | 1  | 1.8  |
| 5350 Strn 45-780 -1 | CTTNBP2   | 83992 | 16975496  | 309  | 8   | 5  | 3.5  |
| 5350 Strn 45-780 -1 | CTTNBP2NL | 55917 | 24308179  | 1280 | 36  | 22 | 38.3 |
| 5694 Strn 45-780 -2 | CTTNBP2NL | 55917 | 24308179  | 863  | 50  | 14 | 27.5 |
| 5350 Strn 45-780 -1 | FAM40A    | 85369 | 56790935  | 1622 | 88  | 28 | 43.7 |
| 5694 Strn 45-780 -2 | FAM40A    | 85369 | 56790935  | 1523 | 122 | 25 | 43.7 |
| 5350 Strn 45-780 -1 | FAM40B    | 57464 | 55742705  | 452  | 17  | 6  | 12.9 |
| 5694 Strn 45-780 -2 | FAM40B    | 57464 | 197245444 | 267  | 10  | 4  | 11.1 |
| 5350 Strn 45-780 -1 | FGFR1OP2  | 26127 | 24308111  | 875  | 28  | 13 | 61.7 |
| 5694 Strn 45-780 -2 | FGFR1OP2  | 26127 | 24308111  | 762  | 29  | 11 | 57.7 |
| 5350 Strn 45-780 -1 | MOBKL3    | 25843 | 41349449  | 388  | 34  | 6  | 40.9 |
| 5694 Strn 45-780 -2 | MOBKL3    | 25843 | 41349449  | 367  | 35  | 5  | 36.4 |
| 5350 Strn 45-780 -1 | PDCD10    | 11235 | 20127517  | 534  | 24  | 8  | 60.8 |
| 5694 Strn 45-780 -2 | PDCD10    | 11235 | 20127517  | 414  | 19  | 7  | 55.2 |
| 5694 Strn 45-780 -2 | PPP2CA    | 5515  | 4506017   | 388  | 42  | 6  | 28.5 |
| 5350 Strn 45-780 -1 | PPP2CB    | 5516  | 4758952   | 514  | 29  | 9  | 34   |
| 5350 Strn 45-780 -1 | PPP2R1A   | 5518  | 21361399  | 1264 | 63  | 20 | 44.8 |
| 5694 Strn 45-780 -2 | PPP2R1A   | 5518  | 21361399  | 824  | 75  | 12 | 29   |
| 5350 Strn 45-780 -1 | PPP2R1B   | 5519  | 32455246  | 410  | 23  | 1  | 16   |
| 5350 Strn 45-780 -1 | MST4      | 51765 | 15011880  | 541  | 17  | 2  | 22.6 |
| 5694 Strn 45-780 -2 | MST4      | 51765 | 15011880  | 556  | 45  | 10 | 27.6 |
| 5350 Strn 45-780 -1 | SIKE1     | 80143 | 156151379 | 707  | 23  | 11 | 57.8 |
| 5694 Strn 45-780 -2 | SIKE1     | 80143 | 156151377 | 260  | 6   | 4  | 30.9 |
| 5350 Strn 45-780 -1 | SLMAP     | 7871  | 56550043  | 1709 | 75  | 34 | 42.3 |
| 5694 Strn 45-780 -2 | SLMAP     | 7871  | 56550043  | 1159 | 53  | 20 | 31.1 |
| 5350 Strn 45-780 -1 | STK24     | 8428  | 20070158  | 628  | 23  | 10 | 26.2 |
| 5694 Strn 45-780 -2 | STK24     | 8428  | 20070158  | 417  | 47  | 1  | 12.9 |
| 5350 Strn 45-780 -1 | STRN      | 6801  | 51242945  | 2322 | 311 | 35 | 56.2 |
| 5694 Strn 45-780 -2 | STRN      | 6801  | 51242945  | 2549 | 600 | 34 | 56.8 |
| 5350 Strn 45-780 -1 | STRN3     | 29966 | 142976686 | 1488 | 80  | 22 | 41.9 |
| 5694 Strn 45-780 -2 | STRN3     | 29966 | 142976686 | 1643 | 158 | 21 | 43.5 |
| 5350 Strn 45-780 -1 | STRN4     | 29888 | 89886477  | 1383 | 68  | 20 | 47.1 |
| 5694 Strn 45-780 -2 | STRN4     | 29888 | 89886477  | 1655 | 171 | 20 | 50.6 |
| 5350 Strn 45-780 -1 | TCP1      | 6950  | 57863257  | 1286 | 47  | 18 | 48.2 |
| 5694 Strn 45-780 -2 | TCP1      | 6950  | 57863257  | 492  | 19  | 9  | 25.9 |
| 5349 Strn 90-780 -1 | CCT2      | 10576 | 5453603   | 194  | 5   | 4  | 6.7  |
| 5695 Strn 90-780 -2 | CCT2      | 10576 | 5453603   | 360  | 16  | 8  | 11.6 |
| 5349 Strn 90-780 -1 | CCT3      | 7203  | 58761486  | 373  | 13  | 7  | 15.6 |



|                     |           |       |           |      |     |    |      |
|---------------------|-----------|-------|-----------|------|-----|----|------|
| 5695 Strn 90-780 -2 | CCT3      | 7203  | 58761486  | 225  | 11  | 4  | 7.4  |
| 5349 Strn 90-780 -1 | CCT4      | 10575 | 38455427  | 206  | 8   | 4  | 6.5  |
| 5695 Strn 90-780 -2 | CCT4      | 10575 | 38455427  | 325  | 15  | 7  | 12.8 |
| 5349 Strn 90-780 -1 | CCT5      | 22948 | 24307939  | 215  | 8   | 4  | 9.2  |
| 5695 Strn 90-780 -2 | CCT5      | 22948 | 24307939  | 308  | 12  | 7  | 9.1  |
| 5349 Strn 90-780 -1 | CCT6A     | 908   | 4502643   | 195  | 7   | 4  | 8.3  |
| 5695 Strn 90-780 -2 | CCT6A     | 908   | 4502643   | 432  | 22  | 12 | 17.1 |
| 5349 Strn 90-780 -1 | CCT7      | 10574 | 5453607   | 211  | 5   | 4  | 7.7  |
| 5695 Strn 90-780 -2 | CCT7      | 10574 | 5453607   | 319  | 13  | 8  | 12.7 |
| 5349 Strn 90-780 -1 | CCT8      | 10694 | 48762932  | 558  | 22  | 11 | 18.1 |
| 5695 Strn 90-780 -2 | CCT8      | 10694 | 48762932  | 437  | 16  | 9  | 16.1 |
| 5695 Strn 90-780 -2 | COPA      | 1314  | 148536853 | 69   | 3   | 1  | 1.2  |
| 5349 Strn 90-780 -1 | MOBKL3    | 25843 | 41349449  | 245  | 7   | 5  | 36.4 |
| 5695 Strn 90-780 -2 | MOBKL3    | 25843 | 41349449  | 153  | 8   | 3  | 22.2 |
| 5349 Strn 90-780 -1 | PDCD10    | 11235 | 20127517  | 381  | 13  | 7  | 41.5 |
| 5695 Strn 90-780 -2 | PDCD10    | 11235 | 20127517  | 220  | 12  | 5  | 18.9 |
| 5349 Strn 90-780 -1 | PPP2R1A   | 5518  | 21361399  | 59   | 1   | 1  | 1.7  |
| 5695 Strn 90-780 -2 | PPP2R1A   | 5518  | 21361399  | 81   | 3   | 2  | 3.4  |
| 5349 Strn 90-780 -1 | MST4      | 51765 | 15011880  | 369  | 9   | 6  | 16.3 |
| 5695 Strn 90-780 -2 | MST4      | 51765 | 15011880  | 291  | 21  | 2  | 12   |
| 5349 Strn 90-780 -1 | STK24     | 8428  | 20070158  | 292  | 8   | 1  | 11.7 |
| 5695 Strn 90-780 -2 | STK24     | 8428  | 20070158  | 291  | 19  | 7  | 13.1 |
| 5695 Strn 90-780 -2 | STK25     | 10494 | 21361358  | 71   | 2   | 2  | 3.8  |
| 5349 Strn 90-780 -1 | STRN      | 6801  | 51242945  | 1272 | 59  | 22 | 36.5 |
| 5695 Strn 90-780 -2 | STRN      | 6801  | 51242945  | 1053 | 66  | 21 | 32.8 |
| 5349 Strn 90-780 -1 | STRN3     | 29966 | 142976675 | 367  | 10  | 7  | 18.5 |
| 5349 Strn 90-780 -1 | TCP1      | 6950  | 57863257  | 175  | 7   | 4  | 7    |
| 5695 Strn 90-780 -2 | TCP1      | 6950  | 57863257  | 216  | 13  | 5  | 7.4  |
| 5340 STRN3 1-169 -1 | CCT2      | 10576 | 5453603   | 368  | 11  | 6  | 16.6 |
| 5345 STRN3 1-169 -2 | CCT2      | 10576 | 5453603   | 654  | 16  | 12 | 33.8 |
| 5340 STRN3 1-169 -1 | CCT3      | 7203  | 58761484  | 200  | 7   | 4  | 8.7  |
| 5345 STRN3 1-169 -2 | CCT3      | 7203  | 58761486  | 392  | 13  | 6  | 17.5 |
| 5340 STRN3 1-169 -1 | CCT4      | 10575 | 38455427  | 191  | 6   | 4  | 8.3  |
| 5345 STRN3 1-169 -2 | CCT4      | 10575 | 38455427  | 438  | 11  | 8  | 22.4 |
| 5340 STRN3 1-169 -1 | CCT5      | 22948 | 24307939  | 186  | 3   | 2  | 4.8  |
| 5345 STRN3 1-169 -2 | CCT5      | 22948 | 24307939  | 459  | 12  | 6  | 21.8 |
| 5340 STRN3 1-169 -1 | CCT6A     | 908   | 4502643   | 179  | 5   | 4  | 10   |
| 5345 STRN3 1-169 -2 | CCT6A     | 908   | 4502643   | 556  | 16  | 9  | 24.3 |
| 5340 STRN3 1-169 -1 | CCT7      | 10574 | 5453607   | 166  | 4   | 2  | 6.4  |
| 5345 STRN3 1-169 -2 | CCT7      | 10574 | 5453607   | 375  | 11  | 7  | 13.6 |
| 5340 STRN3 1-169 -1 | CCT8      | 10694 | 48762932  | 332  | 8   | 6  | 11.7 |
| 5345 STRN3 1-169 -2 | CCT8      | 10694 | 48762932  | 646  | 17  | 10 | 21.7 |
| 5340 STRN3 1-169 -1 | CTTNBP2   | 83992 | 16975496  | 384  | 11  | 7  | 4.7  |
| 5345 STRN3 1-169 -2 | CTTNBP2   | 83992 | 16975496  | 242  | 8   | 5  | 3.6  |
| 5340 STRN3 1-169 -1 | CTTNBP2NL | 55917 | 24308179  | 1188 | 42  | 19 | 32.9 |
| 5345 STRN3 1-169 -2 | CTTNBP2NL | 55917 | 24308179  | 1433 | 87  | 24 | 43.2 |
| 5340 STRN3 1-169 -1 | FAM40A    | 85369 | 56790935  | 1686 | 81  | 27 | 40   |
| 5345 STRN3 1-169 -2 | FAM40A    | 85369 | 56790935  | 1843 | 163 | 30 | 49.8 |
| 5340 STRN3 1-169 -1 | FAM40B    | 57464 | 55742705  | 769  | 25  | 10 | 17.5 |
| 5345 STRN3 1-169 -2 | FAM40B    | 57464 | 55742705  | 880  | 34  | 12 | 24.5 |
| 5345 STRN3 1-169 -2 | FGFR1OP2  | 26127 | 24308111  | 130  | 3   | 2  | 9.1  |
| 5340 STRN3 1-169 -1 | MOBKL3    | 25843 | 41349449  | 491  | 34  | 7  | 44.4 |
| 5345 STRN3 1-169 -2 | MOBKL3    | 25843 | 41349449  | 568  | 73  | 8  | 50.7 |
| 5340 STRN3 1-169 -1 | PDCD10    | 11235 | 20127517  | 404  | 18  | 7  | 39.6 |
| 5345 STRN3 1-169 -2 | PDCD10    | 11235 | 20127517  | 637  | 34  | 10 | 60.8 |

|      |       |       |    |           |       |           |      |     |    |      |
|------|-------|-------|----|-----------|-------|-----------|------|-----|----|------|
| 5340 | STRN3 | 1-169 | -1 | PPP2CA    | 5515  | 4506017   | 441  | 31  | 8  | 29.4 |
| 5345 | STRN3 | 1-169 | -2 | PPP2CA    | 5515  | 4506017   | 528  | 53  | 9  | 42.7 |
| 5340 | STRN3 | 1-169 | -1 | PPP2R1A   | 5518  | 21361399  | 1010 | 55  | 17 | 35.1 |
| 5345 | STRN3 | 1-169 | -2 | PPP2R1A   | 5518  | 21361399  | 1265 | 93  | 20 | 40.9 |
| 5340 | STRN3 | 1-169 | -1 | PPP2R1B   | 5519  | 32455244  | 507  | 16  | 5  | 18.7 |
| 5345 | STRN3 | 1-169 | -2 | PPP2R1B   | 5519  | 32455244  | 730  | 32  | 7  | 22.6 |
| 5340 | STRN3 | 1-169 | -1 | MST4      | 51765 | 15011880  | 545  | 19  | 4  | 30.5 |
| 5345 | STRN3 | 1-169 | -2 | MST4      | 51765 | 15011880  | 616  | 27  | 4  | 26   |
| 5345 | STRN3 | 1-169 | -2 | SIKE1     | 80143 | 156151377 | 231  | 5   | 4  | 26.6 |
| 5340 | STRN3 | 1-169 | -1 | SLMAP     | 7871  | 56550043  | 126  | 4   | 2  | 2.8  |
| 5345 | STRN3 | 1-169 | -2 | SLMAP     | 7871  | 56550043  | 988  | 30  | 18 | 28.7 |
| 5340 | STRN3 | 1-169 | -1 | STK24     | 8428  | 20070158  | 556  | 21  | 11 | 28.4 |
| 5345 | STRN3 | 1-169 | -2 | STK24     | 8428  | 20070158  | 700  | 27  | 12 | 33   |
| 5340 | STRN3 | 1-169 | -1 | STK25     | 10494 | 21361358  | 278  | 8   | 1  | 14.1 |
| 5345 | STRN3 | 1-169 | -2 | STK25     | 10494 | 21361358  | 383  | 16  | 1  | 14.3 |
| 5340 | STRN3 | 1-169 | -1 | STRN      | 6801  | 51242945  | 1803 | 70  | 29 | 51.4 |
| 5345 | STRN3 | 1-169 | -2 | STRN      | 6801  | 51242945  | 2457 | 140 | 34 | 67.9 |
| 5340 | STRN3 | 1-169 | -1 | STRN3     | 29966 | 142976686 | 1781 | 170 | 24 | 42   |
| 5345 | STRN3 | 1-169 | -2 | STRN3     | 29966 | 142976686 | 2518 | 272 | 35 | 49.3 |
| 5340 | STRN3 | 1-169 | -1 | STRN4     | 29888 | 89886477  | 1410 | 76  | 18 | 40.2 |
| 5345 | STRN3 | 1-169 | -2 | STRN4     | 29888 | 89886477  | 1988 | 224 | 23 | 56.6 |
| 5340 | STRN3 | 1-169 | -1 | TCP1      | 6950  | 57863257  | 102  | 3   | 2  | 4.9  |
| 5345 | STRN3 | 1-169 | -2 | TCP1      | 6950  | 57863257  | 606  | 14  | 10 | 29.9 |
| 5346 | STRN3 | 1-388 | -1 | CCT2      | 10576 | 5453603   | 35   | 1   | 1  | 1.9  |
| 5346 | STRN3 | 1-388 | -1 | CCT3      | 7203  | 58761484  | 37   | 1   | 1  | 2.2  |
| 5346 | STRN3 | 1-388 | -1 | CCT4      | 10575 | 38455427  | 47   | 2   | 1  | 1.5  |
| 5574 | STRN3 | 1-388 | -2 | CCT4      | 10575 | 38455427  | 69   | 4   | 1  | 2.8  |
| 5346 | STRN3 | 1-388 | -1 | CCT5      | 22948 | 24307939  | 257  | 7   | 5  | 10   |
| 5574 | STRN3 | 1-388 | -2 | CCT5      | 22948 | 24307939  | 37   | 1   | 1  | 1.5  |
| 5346 | STRN3 | 1-388 | -1 | CCT6A     | 908   | 4502643   | 95   | 3   | 2  | 3.8  |
| 5346 | STRN3 | 1-388 | -1 | CCT7      | 10574 | 5453607   | 59   | 2   | 1  | 1.7  |
| 5574 | STRN3 | 1-388 | -2 | CCT7      | 10574 | 5453607   | 115  | 2   | 2  | 3.9  |
| 5346 | STRN3 | 1-388 | -1 | CCT8      | 10694 | 48762932  | 163  | 6   | 4  | 7.3  |
| 5574 | STRN3 | 1-388 | -2 | CCT8      | 10694 | 48762932  | 120  | 4   | 3  | 4.6  |
| 5346 | STRN3 | 1-388 | -1 | CTTNBP2   | 83992 | 16975496  | 138  | 5   | 3  | 1.8  |
| 5574 | STRN3 | 1-388 | -2 | CTTNBP2   | 83992 | 16975496  | 329  | 12  | 8  | 4.6  |
| 5346 | STRN3 | 1-388 | -1 | CTTNBP2NL | 55917 | 24308179  | 520  | 19  | 10 | 15.6 |
| 5574 | STRN3 | 1-388 | -2 | CTTNBP2NL | 55917 | 24308179  | 600  | 23  | 11 | 15.8 |
| 5346 | STRN3 | 1-388 | -1 | FAM40A    | 85369 | 56790935  | 583  | 31  | 11 | 19   |
| 5574 | STRN3 | 1-388 | -2 | FAM40A    | 85369 | 56790935  | 625  | 36  | 13 | 19   |
| 5574 | STRN3 | 1-388 | -2 | FAM40B    | 57464 | 55742705  | 258  | 13  | 2  | 5.4  |
| 5346 | STRN3 | 1-388 | -1 | FGFR1OP2  | 26127 | 24308111  | 153  | 5   | 4  | 24.1 |
| 5574 | STRN3 | 1-388 | -2 | FGFR1OP2  | 26127 | 24308111  | 116  | 4   | 3  | 8.3  |
| 5346 | STRN3 | 1-388 | -1 | MOBKL3    | 25843 | 41349449  | 348  | 18  | 6  | 40   |
| 5574 | STRN3 | 1-388 | -2 | MOBKL3    | 25843 | 41349449  | 192  | 12  | 4  | 32   |
| 5346 | STRN3 | 1-388 | -1 | PDCD10    | 11235 | 20127517  | 487  | 19  | 9  | 46.2 |
| 5574 | STRN3 | 1-388 | -2 | PDCD10    | 11235 | 20127517  | 349  | 15  | 7  | 27.4 |
| 5346 | STRN3 | 1-388 | -1 | PPP2CA    | 5515  | 4506017   | 314  | 17  | 5  | 21.7 |
| 5574 | STRN3 | 1-388 | -2 | PPP2CB    | 5516  | 4758952   | 265  | 10  | 6  | 22   |
| 5346 | STRN3 | 1-388 | -1 | PPP2R1A   | 5518  | 21361399  | 577  | 24  | 10 | 21.7 |
| 5574 | STRN3 | 1-388 | -2 | PPP2R1A   | 5518  | 21361399  | 818  | 35  | 16 | 27.3 |
| 5346 | STRN3 | 1-388 | -1 | PPP2R1B   | 5519  | 32455244  | 297  | 9   | 2  | 8.5  |
| 5574 | STRN3 | 1-388 | -2 | PPP2R1B   | 5519  | 32455244  | 295  | 7   | 2  | 8.5  |
| 5346 | STRN3 | 1-388 | -1 | MST4      | 51765 | 15011880  | 353  | 10  | 2  | 15.1 |
| 5574 | STRN3 | 1-388 | -2 | MST4      | 51765 | 15011880  | 333  | 10  | 4  | 19.2 |

|      |                  |         |       |           |      |    |    |      |
|------|------------------|---------|-------|-----------|------|----|----|------|
| 5346 | STRN3 1-388 -1   | SIKE1   | 80143 | 156151379 | 174  | 4  | 3  | 14.7 |
| 5574 | STRN3 1-388 -2   | SIKE1   | 80143 | 156151379 | 214  | 5  | 4  | 20.4 |
| 5346 | STRN3 1-388 -1   | SLMAP   | 7871  | 56550043  | 677  | 32 | 13 | 17.8 |
| 5574 | STRN3 1-388 -2   | SLMAP   | 7871  | 56550043  | 969  | 57 | 21 | 20.5 |
| 5346 | STRN3 1-388 -1   | STK24   | 8428  | 20070158  | 362  | 11 | 6  | 16.5 |
| 5574 | STRN3 1-388 -2   | STK24   | 8428  | 20070158  | 379  | 15 | 6  | 15.8 |
| 5574 | STRN3 1-388 -2   | STK25   | 10494 | 21361358  | 178  | 5  | 2  | 9.6  |
| 5346 | STRN3 1-388 -1   | STRN    | 6801  | 51242945  | 1077 | 32 | 16 | 27.9 |
| 5574 | STRN3 1-388 -2   | STRN    | 6801  | 51242945  | 573  | 23 | 12 | 18.5 |
| 5346 | STRN3 1-388 -1   | STRN3   | 29966 | 142976686 | 1540 | 70 | 22 | 38.5 |
| 5574 | STRN3 1-388 -2   | STRN3   | 29966 | 142976675 | 1200 | 96 | 18 | 34.4 |
| 5346 | STRN3 1-388 -1   | STRN4   | 29888 | 89886477  | 875  | 33 | 14 | 27.8 |
| 5574 | STRN3 1-388 -2   | STRN4   | 29888 | 89886477  | 566  | 31 | 9  | 16.1 |
| 5343 | STRN3 219-713 -1 | CCT2    | 10576 | 5453603   | 373  | 9  | 6  | 20.4 |
| 5563 | STRN3 219-713 -2 | CCT2    | 10576 | 5453603   | 609  | 17 | 10 | 28.2 |
| 5343 | STRN3 219-713 -1 | CCT3    | 7203  | 58761486  | 440  | 12 | 6  | 16.9 |
| 5563 | STRN3 219-713 -2 | CCT3    | 7203  | 58761486  | 425  | 11 | 7  | 20.6 |
| 5343 | STRN3 219-713 -1 | CCT4    | 10575 | 38455427  | 371  | 9  | 6  | 13.4 |
| 5563 | STRN3 219-713 -2 | CCT4    | 10575 | 38455427  | 235  | 9  | 5  | 9.3  |
| 5343 | STRN3 219-713 -1 | CCT5    | 22948 | 24307939  | 366  | 8  | 6  | 13.1 |
| 5563 | STRN3 219-713 -2 | CCT5    | 22948 | 24307939  | 403  | 13 | 6  | 17.6 |
| 5343 | STRN3 219-713 -1 | CCT6A   | 908   | 4502643   | 171  | 4  | 3  | 11.7 |
| 5563 | STRN3 219-713 -2 | CCT6A   | 908   | 4502643   | 342  | 9  | 6  | 19.6 |
| 5343 | STRN3 219-713 -1 | CCT7    | 10574 | 5453607   | 360  | 10 | 6  | 15.7 |
| 5563 | STRN3 219-713 -2 | CCT7    | 10574 | 5453607   | 408  | 11 | 5  | 17.3 |
| 5343 | STRN3 219-713 -1 | CCT8    | 10694 | 48762932  | 380  | 10 | 7  | 13.1 |
| 5563 | STRN3 219-713 -2 | CCT8    | 10694 | 48762932  | 555  | 13 | 10 | 21.4 |
| 5343 | STRN3 219-713 -1 | MOBKL3  | 25843 | 41349449  | 310  | 12 | 5  | 36.4 |
| 5563 | STRN3 219-713 -2 | MOBKL3  | 25843 | 41349449  | 429  | 29 | 7  | 47.1 |
| 5343 | STRN3 219-713 -1 | PDCD10  | 11235 | 20127517  | 175  | 5  | 2  | 21.2 |
| 5563 | STRN3 219-713 -2 | PDCD10  | 11235 | 20127517  | 205  | 5  | 3  | 25.9 |
| 5343 | STRN3 219-713 -1 | PPP2R1A | 5518  | 21361399  | 32   | 1  | 1  | 3.4  |
| 5563 | STRN3 219-713 -2 | MST4    | 51765 | 15011880  | 105  | 4  | 2  | 6.3  |
| 5343 | STRN3 219-713 -1 | STK24   | 8428  | 20070158  | 183  | 5  | 3  | 8.8  |
| 5343 | STRN3 219-713 -1 | STRN3   | 29966 | 142976675 | 785  | 24 | 11 | 22.3 |
| 5563 | STRN3 219-713 -2 | STRN3   | 29966 | 142976675 | 1223 | 68 | 15 | 25.7 |
| 5343 | STRN3 219-713 -1 | TCP1    | 6950  | 57863257  | 400  | 11 | 7  | 18.2 |
| 5563 | STRN3 219-713 -2 | TCP1    | 6950  | 57863257  | 517  | 14 | 9  | 29.3 |

**Supplementary Table II.** Data corresponding to the fluorescence polarization assay in Figure 2E. STRN3 (aa 286-310) interacts with wild type CCM3 and substitution of K132, K139, K172 and K179 in CCM3 by alanines completely abrogated association. The values below are reported in micromolar and are the average of 9 measurements from three independent binding experiments.

|                          | <b>CCM3 wildtype</b>            | <b>CCM3 K132-139-172-179A</b> |
|--------------------------|---------------------------------|-------------------------------|
|                          | One site binding<br>(hyperbola) | Does not converge             |
| Best-fit values          |                                 |                               |
| BMAX                     | 233.7                           |                               |
| KD                       | 0.1323                          |                               |
| Std. Error               |                                 |                               |
| BMAX                     | 1.18                            |                               |
| KD                       | 0.003396                        |                               |
| 95% Confidence Intervals |                                 |                               |
| BMAX                     | 231.4 to 236.1                  |                               |
| KD                       | 0.1256 to 0.1390                |                               |
| Goodness of Fit          |                                 |                               |
| Degrees of Freedom       | 118                             |                               |
| R <sup>2</sup>           | 0.9905                          |                               |
| Absolute Sum of Squares  | 7780                            |                               |

**Supplementary Table III.** SAINT-filtered interactions for GM130. AP-MS of FLAG-tagged GM130 full-length or a deletion mutant encompassing amino acids 75-271 was performed in biological replicates. The mutant GM130 75-271 was shown to be sufficient for MST4 interaction (Preisinger et al., *J Cell Biol*, 2004). Data was analyzed using SAINT (Choi et al., *Nature Methods*, 2010), using eight negative control runs (AP-MS from cells transfected with the empty vector). Proteins detected with an averaged probability  $\geq 0.7$  (AvgP) and with  $\geq 10$  spectra in at least one of the 2 replicates are listed below. In the table, "Sample ID" refers to the unique identifiers for the sample in our database; "Spectra" indicates the total number of peptides for the prey; "iProb" lists the SAINT probability in the individual analyses; "AvgP" lists the final probability. "|" is a delimiter.

| Bait         | Prey    | Sample ID | Spectra   | iProb     | Spectra in controls | AvgP   |
|--------------|---------|-----------|-----------|-----------|---------------------|--------|
| GM130        | CCT3    | 7105 8698 | 2 10      | 0.75 0.95 | 0 0 0 0 0 0 0 0     | 0.8525 |
| GM130        | GOLGA2  | 7105 8698 | 1815 3270 | 0.96 0.94 | 0 0 0 0 0 0 0 0     | 0.949  |
| GM130        | GORASP1 | 7105 8698 | 18 19     | 0.99 0.99 | 0 0 0 0 0 0 0 0     | 0.9865 |
| GM130        | GORASP2 | 7105 8698 | 6 20      | 0.93 0.96 | 0 0 0 0 0 0 0 0     | 0.9435 |
| GM130        | MST4    | 7105 8698 | 52 104    | 1.00 0.99 | 0 0 0 0 0 0 0 0     | 0.9945 |
| GM130        | NDUFA8  | 7105 8698 | 6 16      | 0.95 0.96 | 0 0 0 0 0 0 0 0     | 0.955  |
| GM130        | PTPN13  | 7105 8698 | 6 33      | 0.68 0.96 | 0 0 0 0 0 0 0 0     | 0.8215 |
| GM130        | SEC16A  | 7105 8698 | 20 26     | 0.98 0.99 | 0 0 0 0 0 0 0 0     | 0.986  |
| GM130        | TUBA4A  | 7105 8698 | 46 62     | 1.00 1.00 | 0 0 0 0 0 0 0 0     | 0.996  |
| GM130        | TUBB2B  | 7105 8698 | 68 97     | 1.00 1.00 | 37 29 0 0 0 0 0 0   | 0.9965 |
| GM130        | TUBB4   | 7105 8698 | 68 97     | 1.00 1.00 | 30 0 0 0 0 0 0 25   | 0.998  |
| GM130        | UBR4    | 7105 8698 | 9 11      | 0.73 0.74 | 0 0 0 0 0 0 0 0     | 0.737  |
| GM130        | USO1    | 7105 8698 | 42 34     | 0.99 0.99 | 0 0 0 0 0 0 0 0     | 0.9885 |
| GM130_75_271 | CCT2    | 7108 8739 | 4 10      | 0.74 0.84 | 0 2 0 0 0 0 0 0     | 0.788  |
| GM130_75_271 | CCT3    | 7108 8739 | 3 10      | 0.84 0.96 | 0 0 0 0 0 0 0 0     | 0.9005 |
| GM130_75_271 | CCT4    | 7108 8739 | 5 13      | 0.94 0.94 | 0 0 0 0 0 0 0 0     | 0.94   |
| GM130_75_271 | COPA    | 7108 8739 | 81 16     | 0.86 0.80 | 0 0 0 0 0 0 0 0     | 0.827  |
| GM130_75_271 | COPB2   | 7108 8739 | 47 13     | 0.90 0.88 | 0 0 0 0 0 0 0 0     | 0.8925 |
| GM130_75_271 | COPE    | 7108 8739 | 22 10     | 0.97 0.96 | 0 0 0 0 0 0 0 0     | 0.963  |
| GM130_75_271 | GOLGA2  | 7108 8739 | 996 1343  | 0.93 0.93 | 0 0 0 0 0 0 0 0     | 0.928  |
| GM130_75_271 | IRS4    | 7108 8739 | 4 14      | 0.80 0.95 | 0 0 0 0 0 0 0 0     | 0.875  |
| GM130_75_271 | MST4    | 7108 8739 | 30 19     | 0.97 0.50 | 0 0 0 0 0 0 0 0     | 0.733  |
| GM130_75_271 | TUBB4   | 7108 8739 | 72 40     | 1.00 0.68 | 30 0 0 0 0 0 0 25   | 0.841  |

**Supplementary Table IV.** Detailed mass spectrometry data for the GM130 interactions. Complete mass spectrometric information for interaction partners with SAINT AvgP  $\geq 0.7$ , for any components of the CCT complex or for any STRIPAK component (as defined in Goudreau et al., *Mol Cell Proteomics*, 2009) is listed below. "ProHits ID" is the unique identifier for the sample in our internal interaction database, "Mascot" is the score from the Mascot search engine, "n specs" is the total number of peptides, or spectral counts, "n peps" is the number of unique peptides (as defined by the Mascot search engine) and "% cover" is the proportion of the protein sequence that has been detected by mass spectrometry. The mutant GM130 75-271 was shown to be sufficient for MST4 interaction (Preisinger et al., *J Cell Biol*, 2004). STRIPAK proteins below the SAINT threshold are highlighted in grey.

| ProHits ID | Bait Name       | Hit Name | Hit Gene ID | gi number | Mascot | n specs | n peps | % cover |
|------------|-----------------|----------|-------------|-----------|--------|---------|--------|---------|
| 7105       | GM130 -1        | CCT2     | 10576       | 5453603   | 42     | 1       | 1      | 2.8     |
| 8698       | GM130 -2        | CCT2     | 10576       | 5453603   | 354    | 8       | 5      | 19.8    |
| 7105       | GM130 -1        | CCT3     | 7203        | 58761484  | 68     | 2       | 1      | 2.2     |
| 8698       | GM130 -2        | CCT3     | 7203        | 58761486  | 339    | 10      | 6      | 23.3    |
| 7105       | GM130 -1        | CCT4     | 10575       | 38455427  | 203    | 4       | 4      | 7.8     |
| 8698       | GM130 -2        | CCT4     | 10575       | 38455427  | 163    | 6       | 3      | 11.5    |
| 7105       | GM130 -1        | CCT5     | 22948       | 24307939  | 152    | 3       | 2      | 8.5     |
| 8698       | GM130 -2        | CCT5     | 22948       | 24307939  | 313    | 10      | 5      | 20.7    |
| 7105       | GM130 -1        | CCT6A    | 908         | 4502643   | 69     | 1       | 1      | 3.2     |
| 8698       | GM130 -2        | CCT6A    | 908         | 4502643   | 171    | 9       | 3      | 10.9    |
| 7105       | GM130 -1        | CCT7     | 10574       | 58331185  | 37     | 1       | 1      | 2.9     |
| 8698       | GM130 -2        | CCT7     | 10574       | 5453607   | 112    | 3       | 2      | 6.6     |
| 7105       | GM130 -1        | CCT8     | 10694       | 48762932  | 194    | 6       | 5      | 9.7     |
| 8698       | GM130 -2        | CCT8     | 10694       | 48762932  | 140    | 6       | 3      | 5.1     |
| 7105       | GM130 -1        | GOLGA2   | 2801        | 194097392 | 4149   | 1815    | 61     | 63.6    |
| 8698       | GM130 -2        | GOLGA2   | 2801        | 194097392 | 3084   | 3270    | 42     | 57.6    |
| 7105       | GM130 -1        | GORASP1  | 64689       | 13994253  | 223    | 18      | 4      | 16.8    |
| 8698       | GM130 -2        | GORASP1  | 64689       | 13994253  | 140    | 19      | 2      | 6.4     |
| 7105       | GM130 -1        | GORASP2  | 26003       | 29826294  | 86     | 6       | 1      | 5.3     |
| 8698       | GM130 -2        | GORASP2  | 26003       | 29826294  | 260    | 20      | 4      | 15.7    |
| 8698       | GM130 -2        | MOBKL3   | 25843       | 41349449  | 44     | 2       | 1      | 6.2     |
| 7105       | GM130 -1        | NDUFA8   | 4702        | 7657369   | 177    | 6       | 3      | 18      |
| 8698       | GM130 -2        | NDUFA8   | 4702        | 7657369   | 263    | 16      | 5      | 34.3    |
| 8698       | GM130 -2        | PDCD10   | 11235       | 20127517  | 172    | 5       | 3      | 22.6    |
| 7105       | GM130 -1        | PPP2R1A  | 5518        | 21361399  | 31     | 1       | 1      | 3.4     |
| 7105       | GM130 -1        | PTPN13   | 5783        | 5453992   | 284    | 6       | 6      | 3.8     |
| 8698       | GM130 -2        | PTPN13   | 5783        | 5453992   | 985    | 33      | 21     | 14.1    |
| 7105       | GM130 -1        | MST4     | 51765       | 15011880  | 721    | 52      | 12     | 34.1    |
| 8698       | GM130 -2        | MST4     | 51765       | 15011880  | 791    | 104     | 12     | 38      |
| 7105       | GM130 -1        | SEC16A   | 9919        | 124378039 | 713    | 20      | 14     | 10.1    |
| 8698       | GM130 -2        | SEC16A   | 9919        | 124378039 | 664    | 26      | 16     | 13.3    |
| 8698       | GM130 -2        | STK25    | 10494       | 21361358  | 358    | 59      | 1      | 14.1    |
| 7105       | GM130 -1        | TCP1     | 6950        | 57863257  | 34     | 1       | 1      | 2.2     |
| 8698       | GM130 -2        | TCP1     | 6950        | 57863257  | 53     | 1       | 1      | 4.1     |
| 7105       | GM130 -1        | USO1     | 8615        | 4505541   | 1480   | 42      | 26     | 33.4    |
| 8698       | GM130 -2        | USO1     | 8615        | 4505541   | 667    | 34      | 11     | 18.5    |
| 7108       | GM130 75-271 -1 | CCT2     | 10576       | 5453603   | 143    | 4       | 2      | 5.6     |
| 8739       | GM130 75-271 -2 | CCT2     | 10576       | 5453603   | 438    | 10      | 6      | 15.7    |
| 7108       | GM130 75-271 -1 | CCT3     | 7203        | 58761484  | 133    | 3       | 3      | 9.7     |
| 8739       | GM130 75-271 -2 | CCT3     | 7203        | 58761486  | 353    | 10      | 7      | 23.3    |
| 7108       | GM130 75-271 -1 | CCT4     | 10575       | 38455427  | 232    | 5       | 4      | 9.8     |

|      |       |        |    |        |       |           |      |      |    |      |
|------|-------|--------|----|--------|-------|-----------|------|------|----|------|
| 8739 | GM130 | 75-271 | -2 | CCT4   | 10575 | 38455427  | 372  | 13   | 6  | 16.9 |
| 7108 | GM130 | 75-271 | -1 | CCT5   | 22948 | 24307939  | 148  | 3    | 2  | 8.5  |
| 8739 | GM130 | 75-271 | -2 | CCT5   | 22948 | 24307939  | 288  | 10   | 4  | 13.3 |
| 7108 | GM130 | 75-271 | -1 | CCT6A  | 908   | 4502643   | 153  | 3    | 3  | 13.7 |
| 8739 | GM130 | 75-271 | -2 | CCT6A  | 908   | 4502643   | 202  | 7    | 4  | 13.4 |
| 7108 | GM130 | 75-271 | -1 | CCT7   | 10574 | 5453607   | 75   | 2    | 1  | 2.6  |
| 8739 | GM130 | 75-271 | -2 | CCT7   | 10574 | 5453607   | 192  | 5    | 3  | 7.7  |
| 7108 | GM130 | 75-271 | -1 | CCT8   | 10694 | 48762932  | 184  | 5    | 4  | 8    |
| 8739 | GM130 | 75-271 | -2 | CCT8   | 10694 | 48762932  | 466  | 16   | 8  | 17.7 |
| 7108 | GM130 | 75-271 | -1 | COPA   | 1314  | 148536855 | 2118 | 81   | 38 | 36.2 |
| 8739 | GM130 | 75-271 | -2 | COPA   | 1314  | 148536853 | 393  | 16   | 9  | 11.8 |
| 7108 | GM130 | 75-271 | -1 | GOLGA2 | 2801  | 194097392 | 1136 | 996  | 17 | 14.6 |
| 8739 | GM130 | 75-271 | -2 | GOLGA2 | 2801  | 194097392 | 1147 | 1343 | 16 | 15.3 |
| 7108 | GM130 | 75-271 | -1 | MST4   | 51765 | 15011880  | 782  | 30   | 14 | 37.5 |
| 8739 | GM130 | 75-271 | -2 | MST4   | 51765 | 15011880  | 351  | 19   | 8  | 26   |
| 7108 | GM130 | 75-271 | -1 | TCP1   | 6950  | 57863259  | 42   | 1    | 1  | 5.2  |
| 8739 | GM130 | 75-271 | -2 | TCP1   | 6950  | 57863257  | 381  | 10   | 8  | 20.1 |

**Supplementary Table V.** Mass spectrometry data used to quantify the recovery of STRIPAK components and GM130 in FLAG-MST4 immunoprecipitates following silencing of CCM3 or STRNs by esiRNA. Columns 2-4 list the spectral counts for each of the identified proteins across the different samples (ProteinPilot, 80% confidence). The number of spectral peaks used for quantification is listed in column 5; all peptides were manually validated.

| hit       | Specs esiLuc | Specs esiSTRNs | Specs esiCCM3 | spectral peaks used for MS1 quant |
|-----------|--------------|----------------|---------------|-----------------------------------|
| MST4      | 59           | 100            | 60            | 11                                |
| CCM3      | 37           | 56             | 19            | 8                                 |
| STRN      | 41           | 12             | 7             | 7                                 |
| STRN3     | 31           | 21             | 10            | 6                                 |
| CTTNBP2NL | 18           | 10             | 7             | 3                                 |
| PP2A cat  | 17           | 11             | 5             | 2                                 |
| MOB3      | 12           | 6              | 5             | 3                                 |
| STRIP1    | 16           | 6              | 3             | 2                                 |
| STRN4     | 10           | 4              | 2             | 1                                 |
| PP2A A    | 5            | 2              | 1             | 1                                 |
| GM130     | 0            | 1              | 1             | 1                                 |
